# Supplementary material
Source: PubMed Central journal article supplement (PMC6593885)

**Supplemental Figure S1 Controls for neuronal specificity of NeuN+ samples and matches for gender-specific genes in ChIP-seq data.** (a) Loci showing specific H3K4me3 signal in neuronal or non-neuronal samples: neuron specific *BDNF* and *NSG1* genes, glial *MOG* and *PMP22* genes. (b) As expected, analysis of neuronal cells shows the female-specific H3K4me3 peaks for non-coding RNA gene (*XIST*) on chromosome X and male-specific gene *NLGN4Y* on chromosome Y.

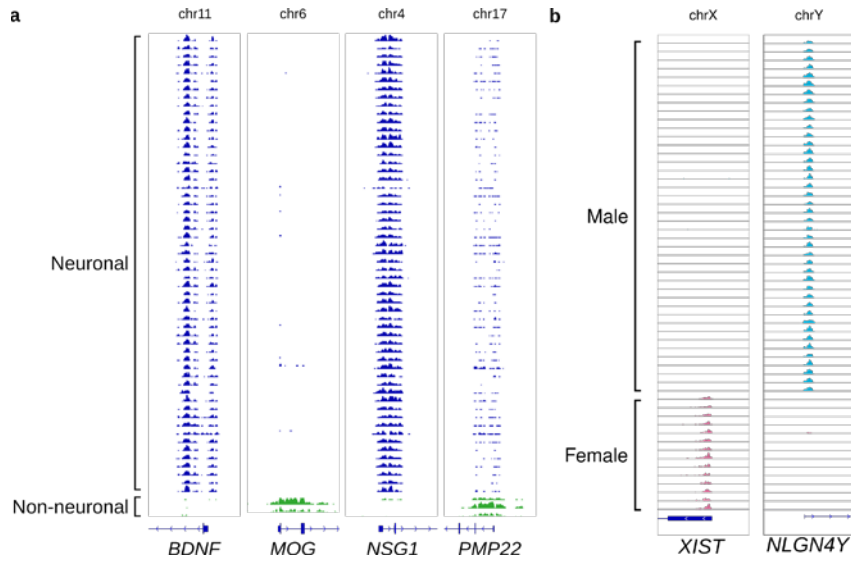

**Supplemental Figure S2 Examples of polymorphic H3K4me3 marked loci.** “Induced” peaks in single individuals (panels chr19, chr9); rare up-regulated peaks in single individuals (designated by star) in promoters of *TDRD5* and *TWIST1* genes (panels chr1, chr7); highly polymorphic peaks in promoter of *GSTT1* (known CNV for this region with global population frequency ~0.5) and *P2RY6* (no reported CNVs for this region) (panels chr22, chr11); locus with non-polymorphic H3K4me3 abundance across all samples (panel chr5).

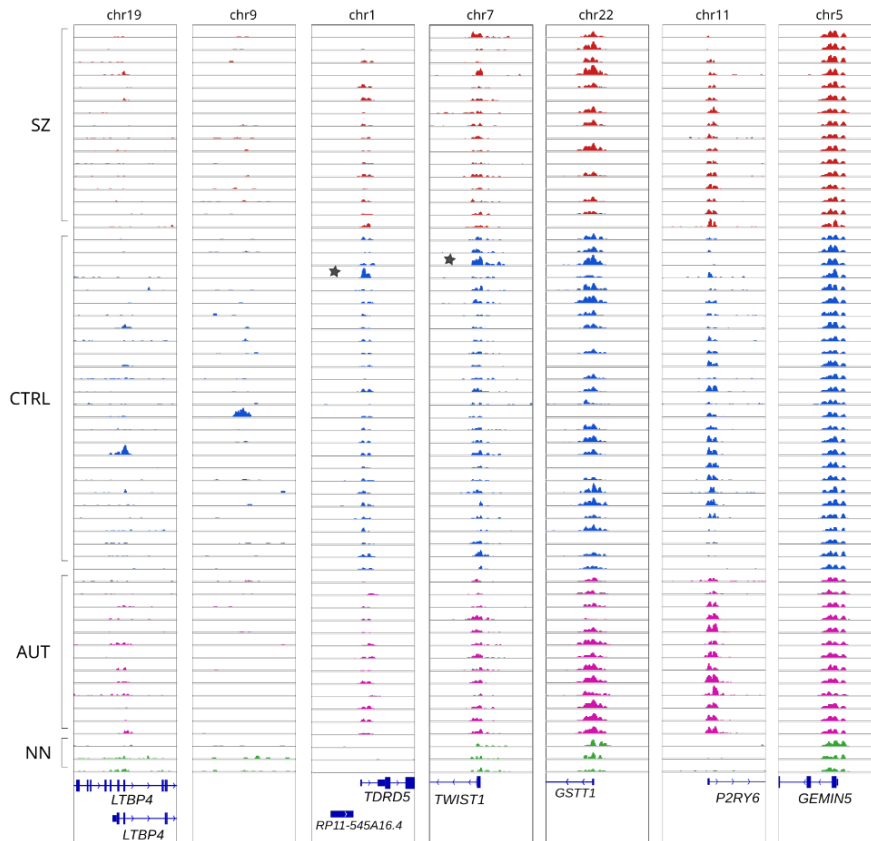

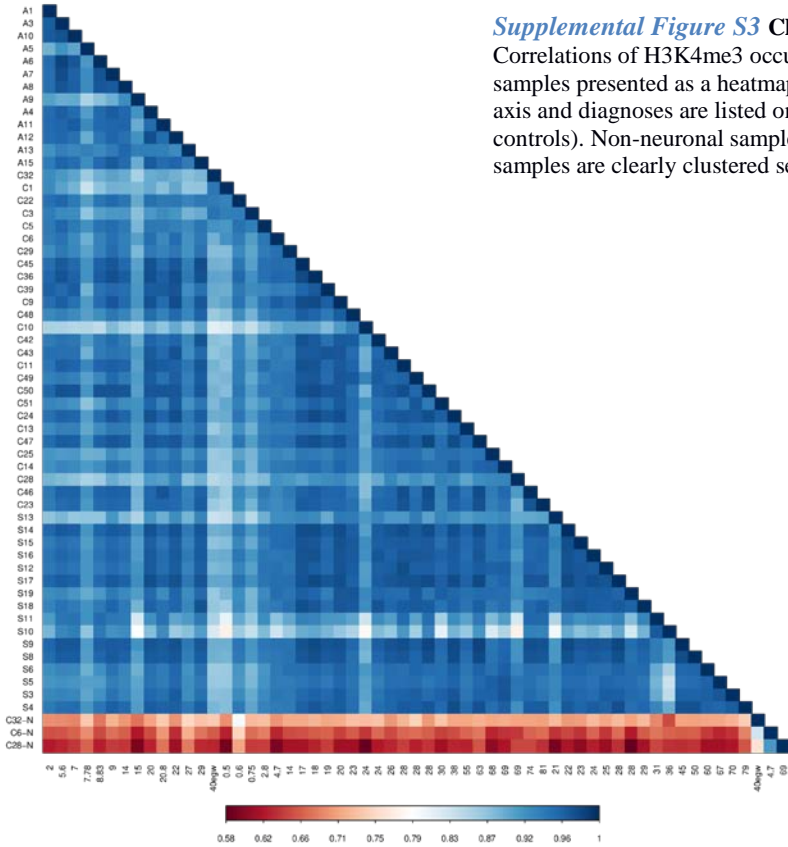

**Supplemental Figure S3 Cluster analysis of H3K4me3 profiles.** Correlations of H3K4me3 occupancy across genome between all pairs of samples presented as a heatmap. In the cluster analysis, ages are listed on x-axis and diagnoses are listed on y-axis (A-autism, S-schizophrenia, C-controls). Non-neuronal samples (C32-N, C6-N, C28-N) and all neuronal samples are clearly clustered separately.

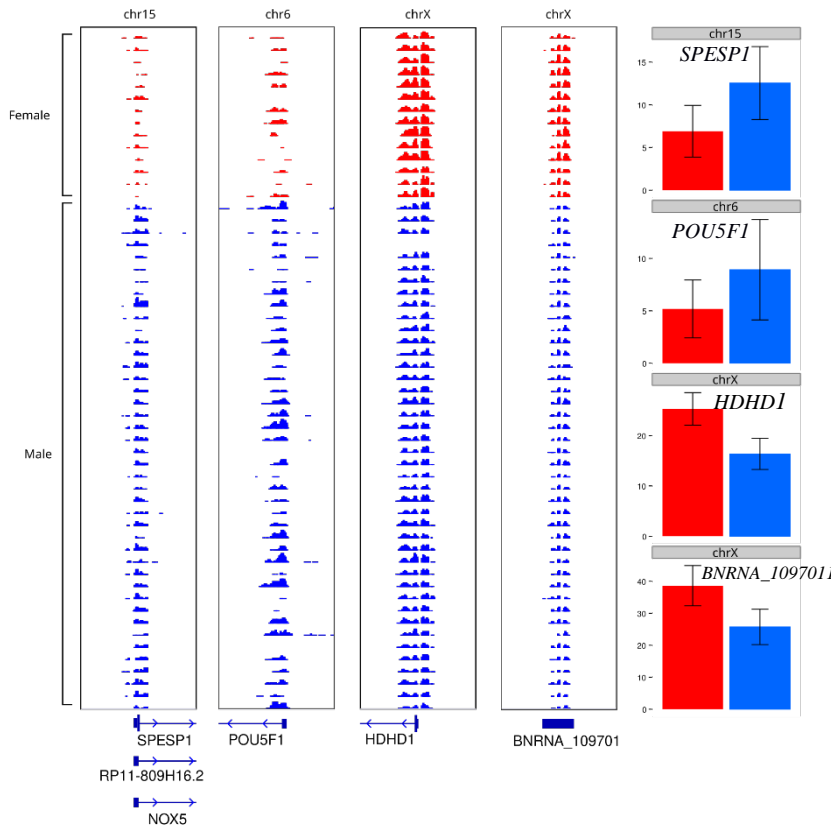

**Supplemental Figure S4 Sex-specific quantitative H3K4me3 peaks.** Examples of sex-specific alterations: promoter of *NOX5* shares H3K4me3 peak with a protein-coding gene *SPESP1* (Sperm Equatorial Segment Protein 1) and a non-coding gene *RP11-809H16.2*; *POUP5F1* translates to protein OCT4, an immunohistochemical marker for central nervous system germinomas, which dominantly develops in male subjects; gene *HDHD1* is known to partially escape X-inactivation; H3K4me3 abundance of a novel non-coding gene *BNRNA\_109701* on chromosome X is different for male and female subjects. The histograms show the standard deviations in groups of male and female individuals for these loci.

**Supplemental Figure S5 (a-f). Example of the newly discovered protein-coded *BNPP* gene.** (a) H3K4me3 signal in human PFC neurons in a locus harboring *BNPP* gene. (b) RNA expression levels of *BNPP* in grey & white matter shown for 20 samples of each tissue. (c) Schematic representation of transcripts and localization of PNMA domain homology. (d) RNA expression in 16 tissues for genes of PNMA family and a new *BNPP* gene; *ALAS1* is a housekeeping gene. (e) Phylogenetic tree of species in which *BNPP* gene was found in this study. Among metatherians, we observed neither amino acid nor nucleotide homolog to human *BNPP* gene. Blue denotes species with *BNPP* gene; in species marked with star, only nucleotide (but not ORF) sequence was found possibly due to missassemblies in the reference genomes of these species. *Monodelphis domestica* is highlighted with yellow. (f) H3K4me3 signal for *Homo sapiens*, *Macaca mulatta* and *Pan troglodytes* in *BNPP* locus.

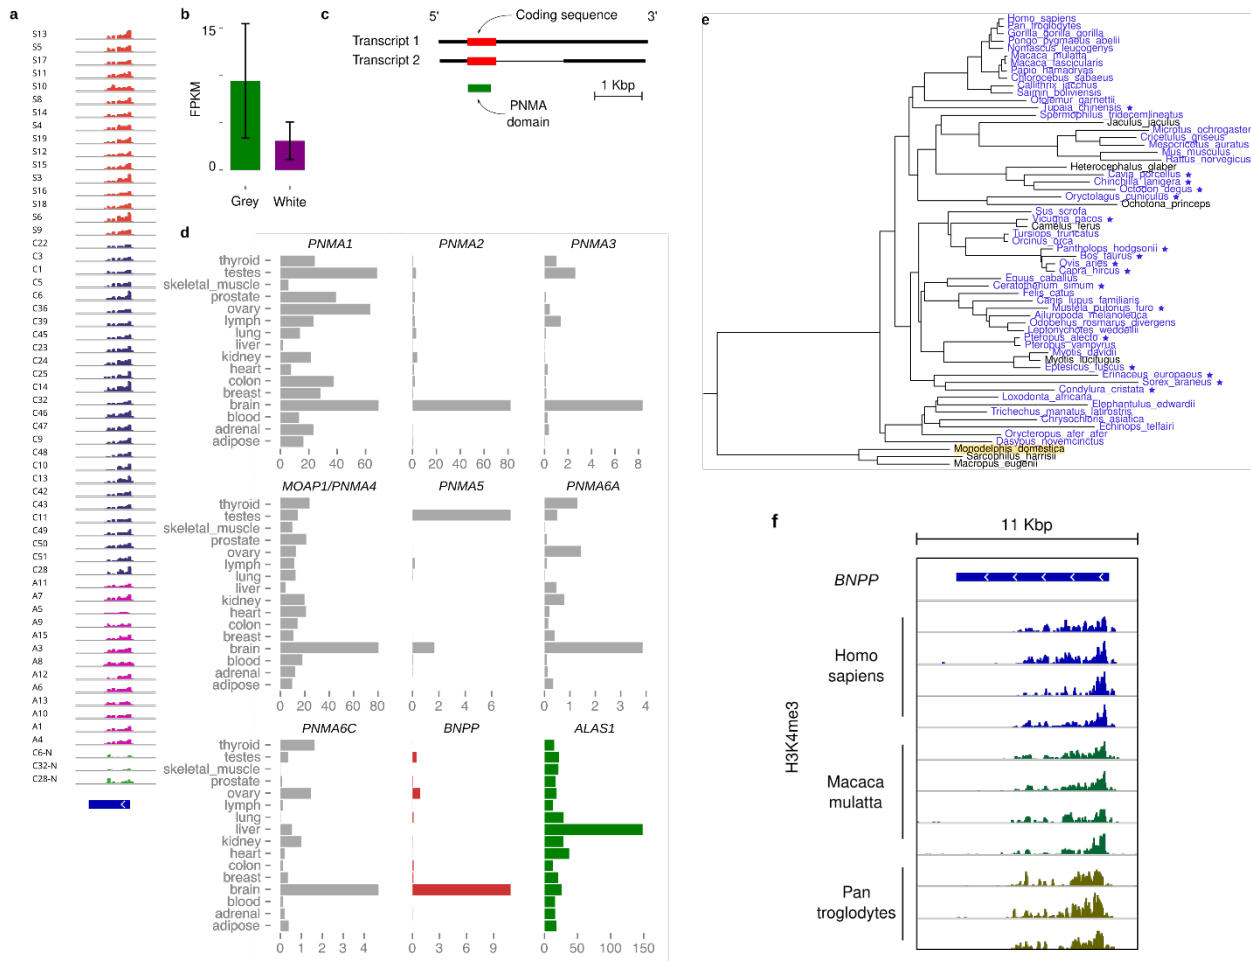

**Supplemental Figure S5 (continuation, g-i)** Example of the newly discovered protein-coded *BNPP* gene. (g) Multiple sequence alignment of *BNPP* protein sequence and members of PNMA family. Highlighted is position 154 bearing mutation specific for Neanderthal and Denisovan. (h) Table of synonymous to non-synonymous substitution ratios (Kn/Ks). (i) A family tree for PNMA-like genes; *PNMA6B* and *PNMA6D* are omitted, since they have 99% identity to *PNMA6A* and *PNMA6C*, respectively.

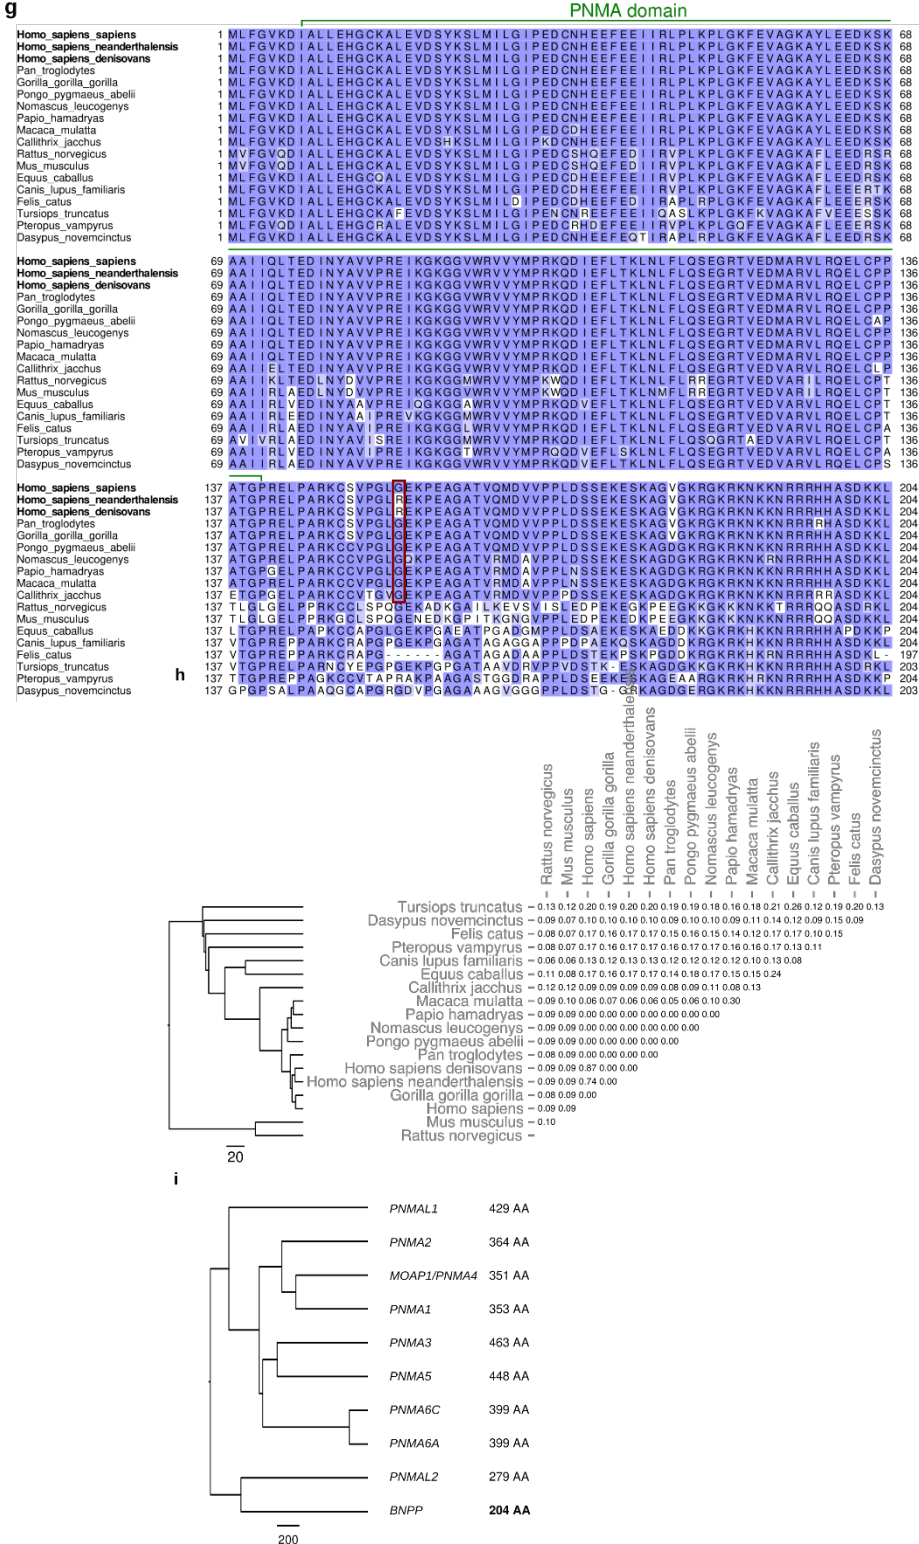

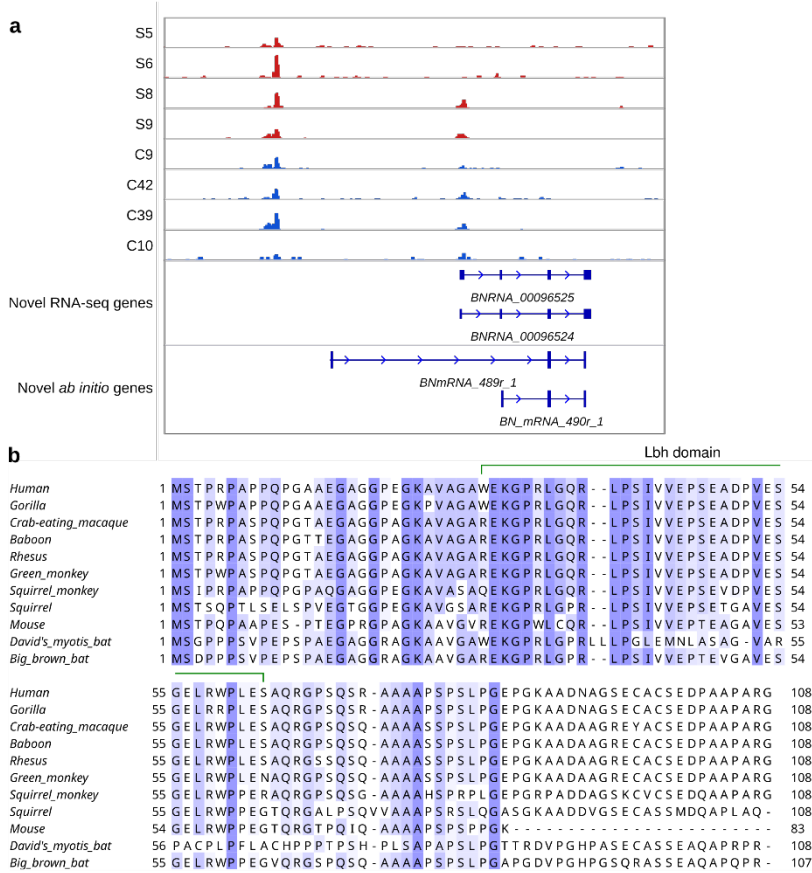

**Supplemental Figure S6 Example of the newly discovered protein coding BN-LBH gene.** (a) The gene for the BN-LBH (brain neuronal) protein was predicted by two independent methods: identification of brain RNA transcripts mapped at their 5'-UTR to H3K4me3 peak regions at chromosome 14:103550302-103551065; computational prediction of spliced transcripts for this H3K4me3-marked region *ab initio*. The H3K4me3 peak at 14:103550302-103551065 is relatively weak and occur in a few but not all individuals regardless of the mental pathology. Another robust H3K4me3-marked locus with no predicted genes is located nearby (14:103541407-103542769). The transcripts correspond to four exons (5'-UTR non-coding exon and three coding exons) and encode the same amino acid sequence. (b) Predicted 106 amino-acid protein (BN-LBH) shows homology to protein domain for family of transcriptional regulators named Lbh (short for Limb, bud and heart) (PFAM search, 65-67% identity, 1.00E-23 – 5.00E-23). The Lbh-proteins are typically between 92 and 116 amino-acids in length and act as regulators of heart in embryonic development and have been suggested as transcriptional activators in MAPK signaling. The recovery of predicted amino-acid sequences from genomes of other mammals showed the high identity to open reading frame (ORF) sequences in other species as well (e.g., 99% to gorilla).

other mammals showed the high identity to open reading frame (ORF) sequences in other species as well (e.g., 99% to gorilla).

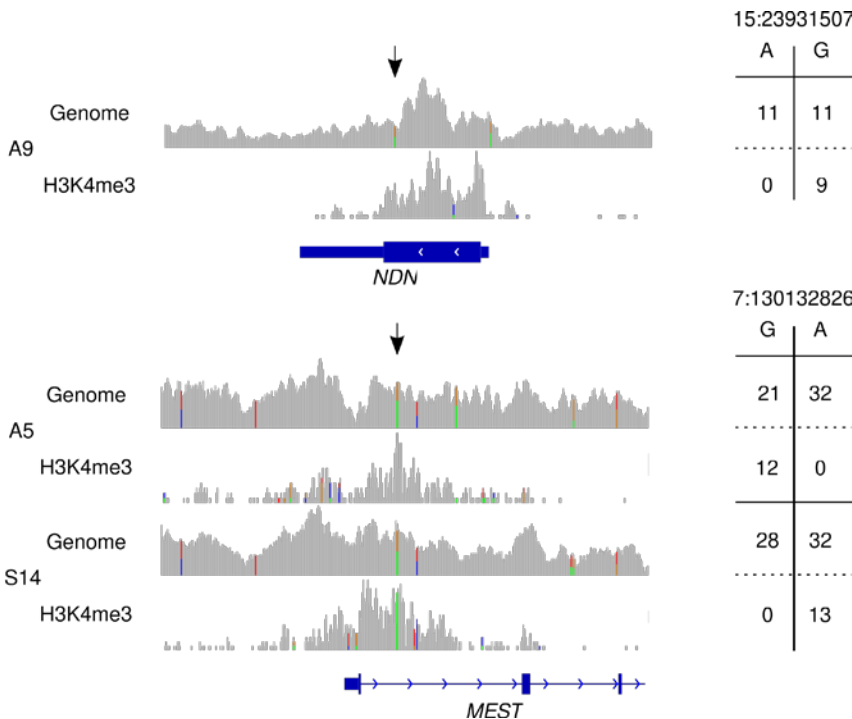

**Supplemental Figure S7 Epigenetic allelic imprinting.** The samples from subjects A5, A9 and S14 were used for both whole genome sequencing and ChIP-seq analysis. Genome sequencing analysis revealed heterozygous G/A SNP (11 reads with G and 11 reads with A) in promoter of imprinted *NDN* gene in A9 subject. ChIP-seq analysis for heterozygous SNP G/A in promoter of *NDN* gene reveals only single G-allele in A9 (0 reads with A and 9 reads with G). The subjects A5 and S14 have heterozygous SNP G/A at the same position of *MEST* gene, but H3K4me3 tags detect only single allele different (allele bearing G or A) for each individual.

**Supplemental Figure S8 Analysis of H3K4me3 signal and expression of *NUP210L* gene.** (a) H3K4me3 peak in *NUP210L* promoter was revealed in 5 individuals only. Individuals with SZ (S) are designated by red, control CTRL (C) – by blue tracks, autistic individuals (A) – by purple. (b) Position for SNP rs114697636 in 4 individuals covered by reads from whole genomic sequencing data showing rare G variant in heterozygous G/A (S14) or homozygous G/G (A5) state and A/A (reference genome) genotype state common in human population (C13, A9). (c) H3K4me3 abundance in *NUP210L* locus in both non-neuronal (N-) and neuronal cells (N+) in the same individual. (d) *NUP210L* RT-PCR analysis of RNA transcripts from brain specimens on gel electrophoresis detected the products in individuals who carry G allele of rs114697636 SNP. UBC housekeeping gene was used as control. (e) Histograms of quantitative measurements of *NUP210L* transcripts by qPCR confirms the significant expression of *NUP210L* in brain of G-allele carrier (S14). (f) Evolutionary conserved site changed by G variant of rs114697636. (g) Gel-shift assay with  $P^{32}$ -labelled 21 bp oligonucleotide duplex probe harboring either C or G variants of rs114697636. The probes were bound to protein from cellular nuclear extracts, in particular, from HEPG2 cell line (with slightly more efficient binding for the G-variant) (left panel). The gel-shift does not depend on salt concentrations (middle panel). The cold competitor probes harboring either C (V1) or G (V2) abolish the binding and show that the upper band as a specific- and lower band as non-specific product. The cold probe with TATA sequence does not compete with the binding (bottom panel). (h) Population frequencies of G allele for rs114697636 (1000 Genomes phase 3); ALL = global, AFR = African, AMR = American, EAS = East Asian, EUR = European, SAS = South Asian. (i) Emerging (green) and disappearing (red) transcription factor binding sites (TFBS) as predicted by PERFECTOS-APE for two TFBS databases: HOCOMOCO and JASPAR.

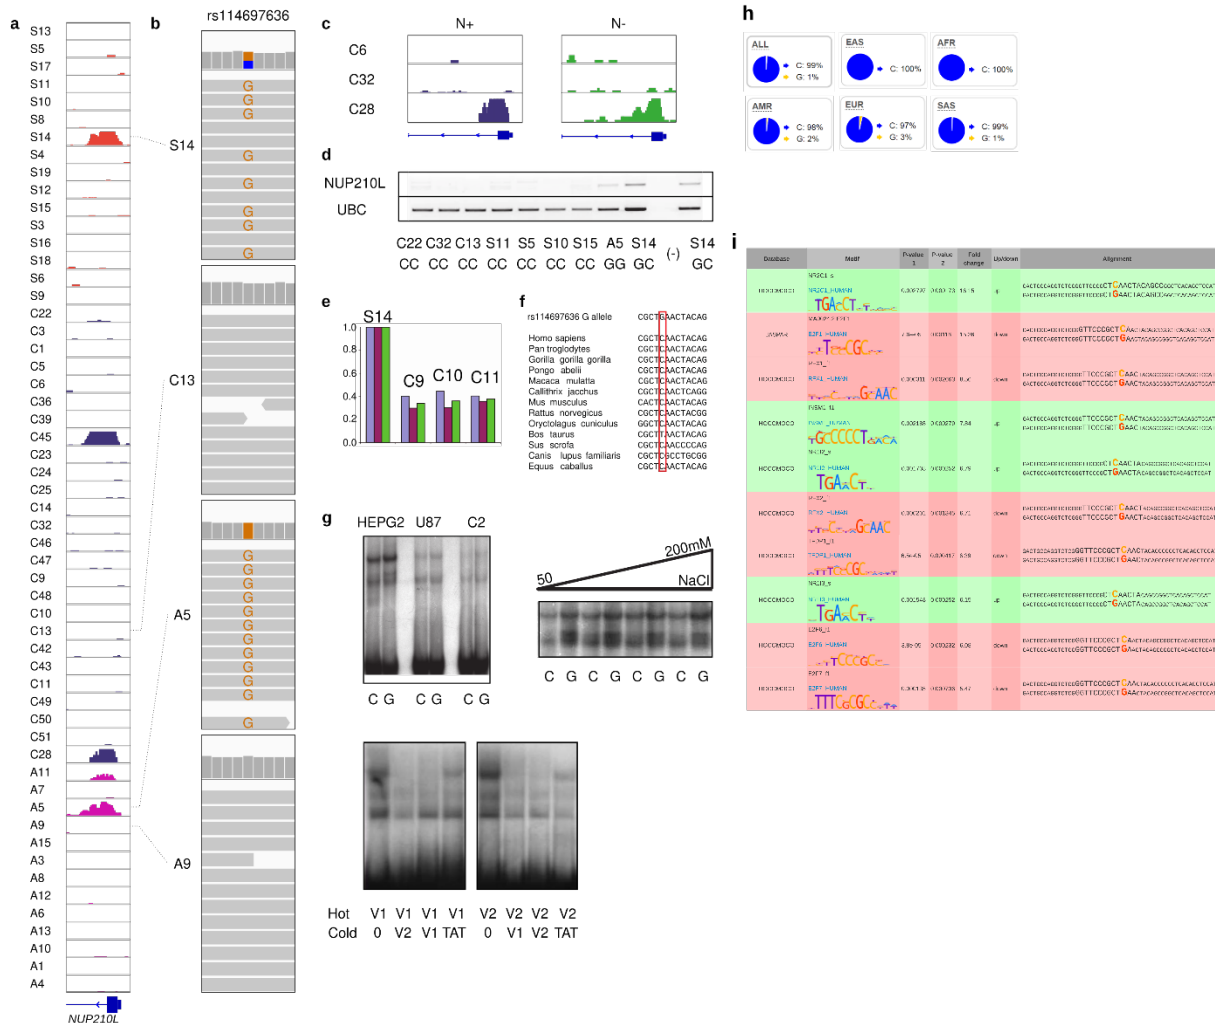

Supplement: fj.201802646R.sf1.pdf [file fj.201802646R.sf1.pdf]
